# Supplementary material for: Heart failure prevalence in the general population: SOBOTA‐HF study rationale and design
Source: PubMed Central journal article supplement — ESC Heart Fail. 2019 Jul 25;6(5):1077–84. doi: 10.1002/ehf2.12496 (PMC6816073; doi:10.1002/ehf2.12496), 2019-07-25
Supplement: EHF2-6-1077-s001.pdf [file EHF2-6-1077-s001.pdf]

Table S1

| <i>Aquisition</i>             |              | <i>Measurement</i> | <i>Calculation</i> |
|-------------------------------|--------------|--------------------|--------------------|
| <b>PLAX</b>                   |              |                    |                    |
| 2D                            | <i>clip</i>  |                    |                    |
| 2D                            | <i>image</i> | LVOTd              |                    |
| color doppler MV+AV           | <i>clip</i>  |                    |                    |
| M-mode MV leaflet tip         | <i>image</i> | IVSd               | LVEDV              |
|                               |              | LVIDd              | LVESV              |
|                               |              | LVPWd              | SV                 |
|                               |              | LVIDs              | EF                 |
|                               |              |                    | %FS                |
|                               |              |                    | LV mass            |
| M-mode Ao/LA                  | <i>image</i> | Ao diameter        |                    |
|                               |              | LAd                |                    |
| <b>PSAX</b>                   |              |                    |                    |
| 2D                            | <i>clip</i>  |                    |                    |
| 2D                            | <i>image</i> | RVOTd              |                    |
| color doppler AV+PV+TV        | <i>clip</i>  |                    |                    |
| CW PV                         | <i>image</i> | PV Vmax            | PV maxPG           |
|                               |              | PR end             | PR end PG          |
| PW RVOT                       | <i>image</i> | RVOT VTI           | RV SV              |
| CW TV                         | <i>image</i> | TR Vmax            | TR maxPG           |
| LV mid pappilary level        | <i>clip</i>  |                    |                    |
| LV apical level               | <i>clip</i>  |                    |                    |
| LV mitral level color doppler | <i>clip</i>  |                    |                    |
| <b>A4C</b>                    |              |                    |                    |
| 2D                            | <i>clip</i>  |                    |                    |
| 2D end systolic/dystolic      | <i>image</i> |                    | LVEDV              |
|                               |              |                    | LVESV              |
|                               |              |                    | SV                 |
|                               |              |                    | EF                 |
|                               |              |                    | LA vol             |
|                               |              |                    | RA area            |
|                               | RVd basal    |                    |                    |
| color doppler MV+AV+TV        | <i>clip</i>  |                    |                    |
| PW MV                         | <i>image</i> | E                  |                    |
|                               |              | A                  |                    |
|                               |              | DT                 |                    |
| PW LVOT                       | <i>image</i> | VTI                | LVSV               |
|                               |              | Vmax               |                    |
| CW AV                         | <i>image</i> | VTI                | AVA                |
|                               |              | Vmax               |                    |
|                               |              | AR PHT             |                    |

|                               |              |                    |                     |
|-------------------------------|--------------|--------------------|---------------------|
| CW TV                         | <i>image</i> | TR Vmax            | TR maxPG            |
| PW P vein                     | <i>image</i> | S                  |                     |
|                               |              | D                  |                     |
|                               |              | A                  |                     |
|                               |              | a <sub>dur</sub>   | A-a <sub>dur</sub>  |
| PW at level of MV             | <i>Image</i> | A <sub>dur</sub>   |                     |
| M-mode RV free wall           | <i>image</i> | TAPSE              |                     |
| PW TDI sept.                  | <i>image</i> | S' <sub>sep</sub>  | E/E' <sub>ave</sub> |
|                               |              | E' <sub>sep</sub>  |                     |
|                               |              | A' <sub>sep</sub>  |                     |
| PW TDI lat.                   | <i>image</i> | E' <sub>lat</sub>  |                     |
| PW TDI DV                     | <i>image</i> | S <sub>to</sub>    |                     |
| Four chambers TDI full screen | <i>clip</i>  |                    |                     |
| <b>A2C</b>                    |              |                    |                     |
| 2D                            | <i>clip</i>  |                    |                     |
| 2D end diastolic/systolic     | <i>image</i> |                    | LVEDV               |
|                               |              |                    | LVESV               |
|                               |              |                    | SV                  |
|                               |              |                    | EF                  |
|                               |              |                    | LA vol              |
| color doppler MV              | <i>clip</i>  |                    |                     |
| <b>APLAX</b>                  |              |                    |                     |
| 2D                            | <i>clip</i>  |                    |                     |
| Color Doppler MV+AV           | <i>clip</i>  |                    |                     |
| Width, depth, focus on LV     | <i>clip</i>  |                    | strain              |
| <b>VCI</b>                    |              |                    |                     |
|                               | <i>image</i> | VCI <sub>exp</sub> | CVP <sub>est</sub>  |
|                               |              | VCI <sub>ins</sub> |                     |
| <b>VCI</b>                    |              |                    |                     |
| 2 and 3 ICP left and right    | <i>clip</i>  |                    |                     |
